# Supplementary material for: Versatile CRISPR/Cas9 Systems for Genome Editing in Ustilago maydis
Source: MDPI journal article supplement (doi:10.3390/jof7020149), 2021-02-18
Supplement: s1 [file s1]

A

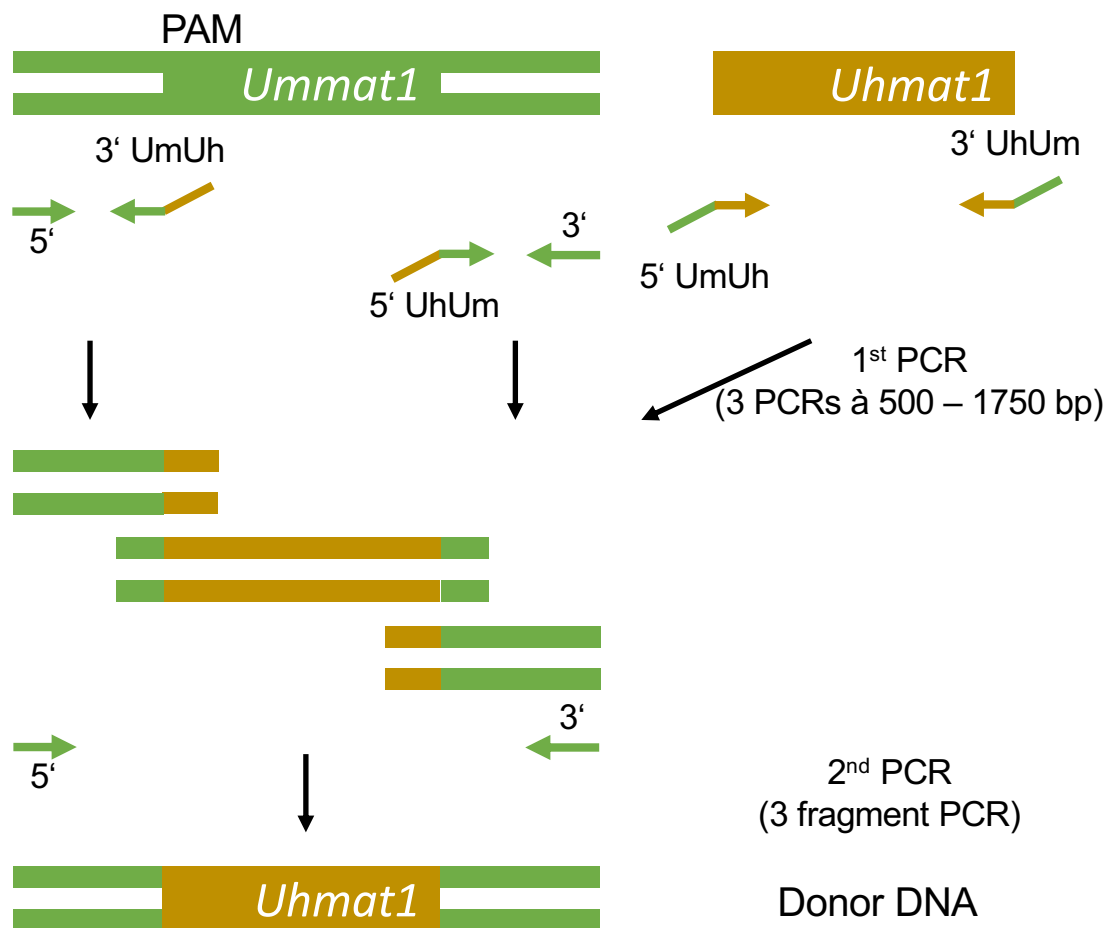

B

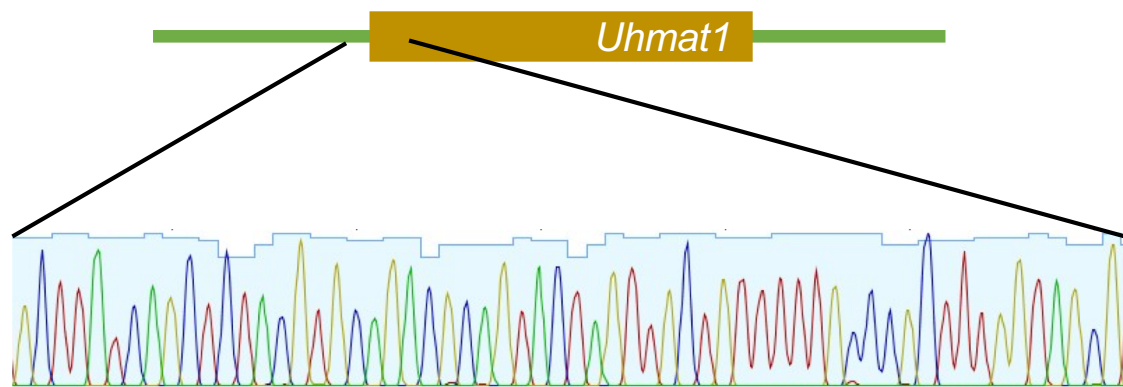

*Pmat1-Uhmat1* GCAATACTGCACATCGAGCTGTCGCTGATCATGAAGCAGAAAAAGCCCGCAAAGGATGCG  
M K Q K K P A K D A

*Pmat1-Ummat1* GCAATACTGCACATCGAGCTGTCGCTGATCATGAAGAGCAACGTGGATACTGTGCTGGAC  
M K S N V D T V L D
