# Supplementary figures and images for: Versatile CRISPR/Cas9 Systems for Genome Editing in Ustilago maydis
Source: MDPI journal article supplement (doi:10.3390/jof7020149), 2021-02-18

A

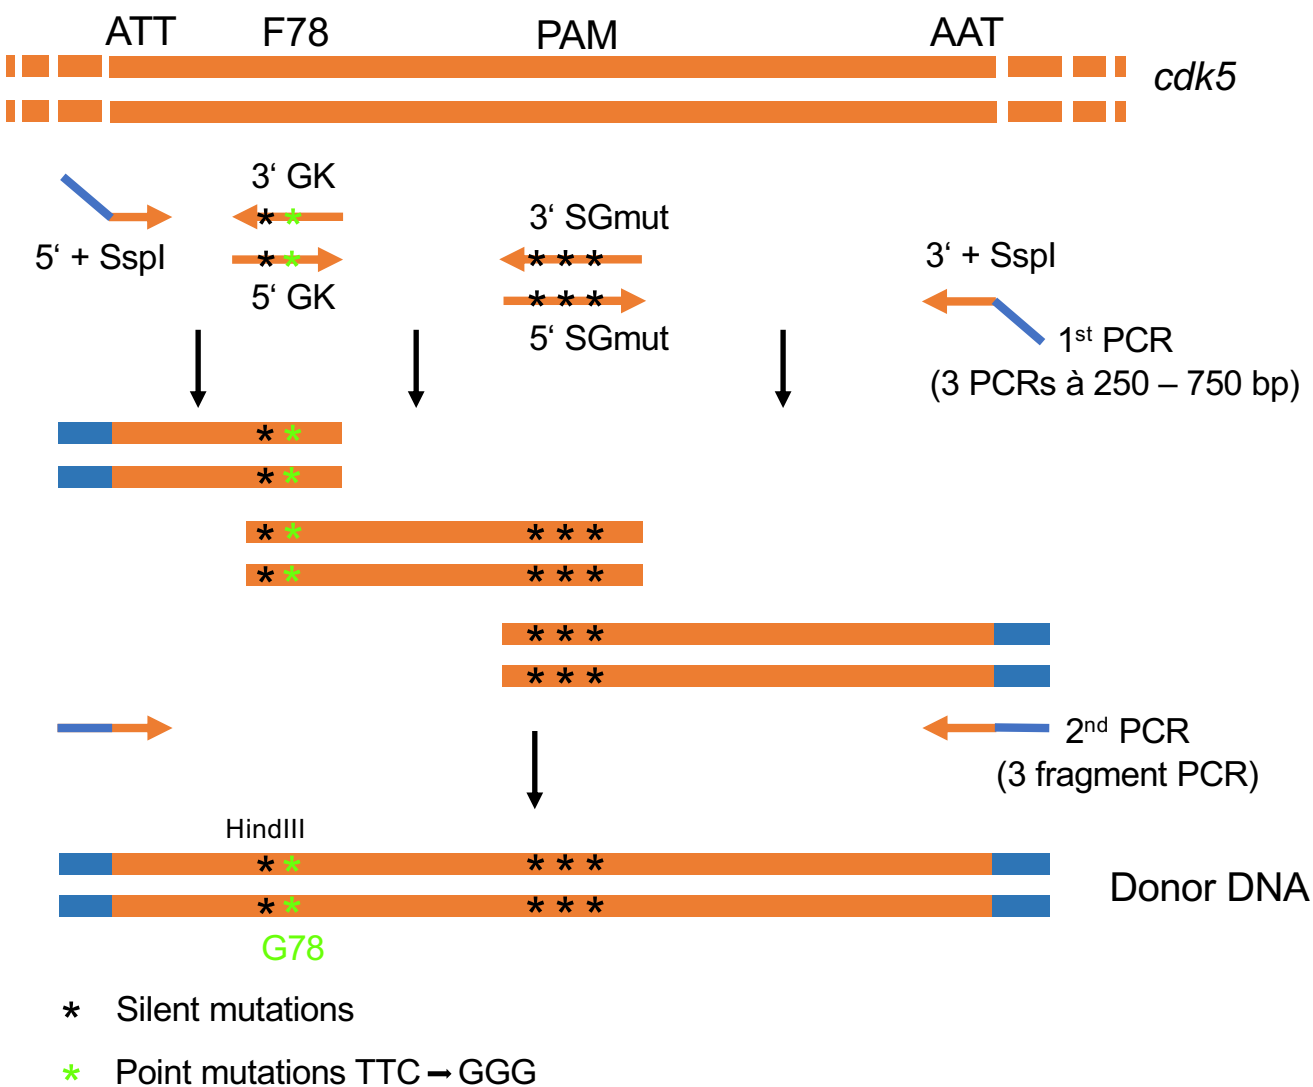

B

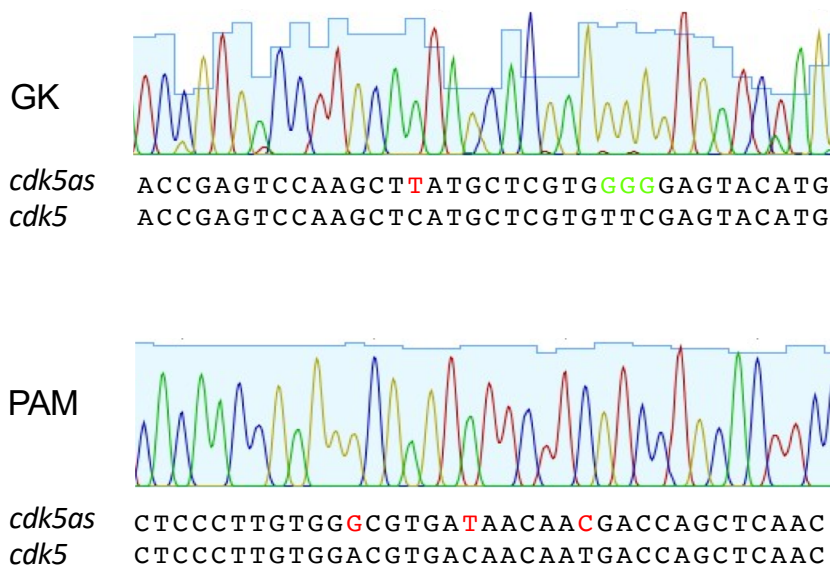

Supplement: s1 [file s1]

A

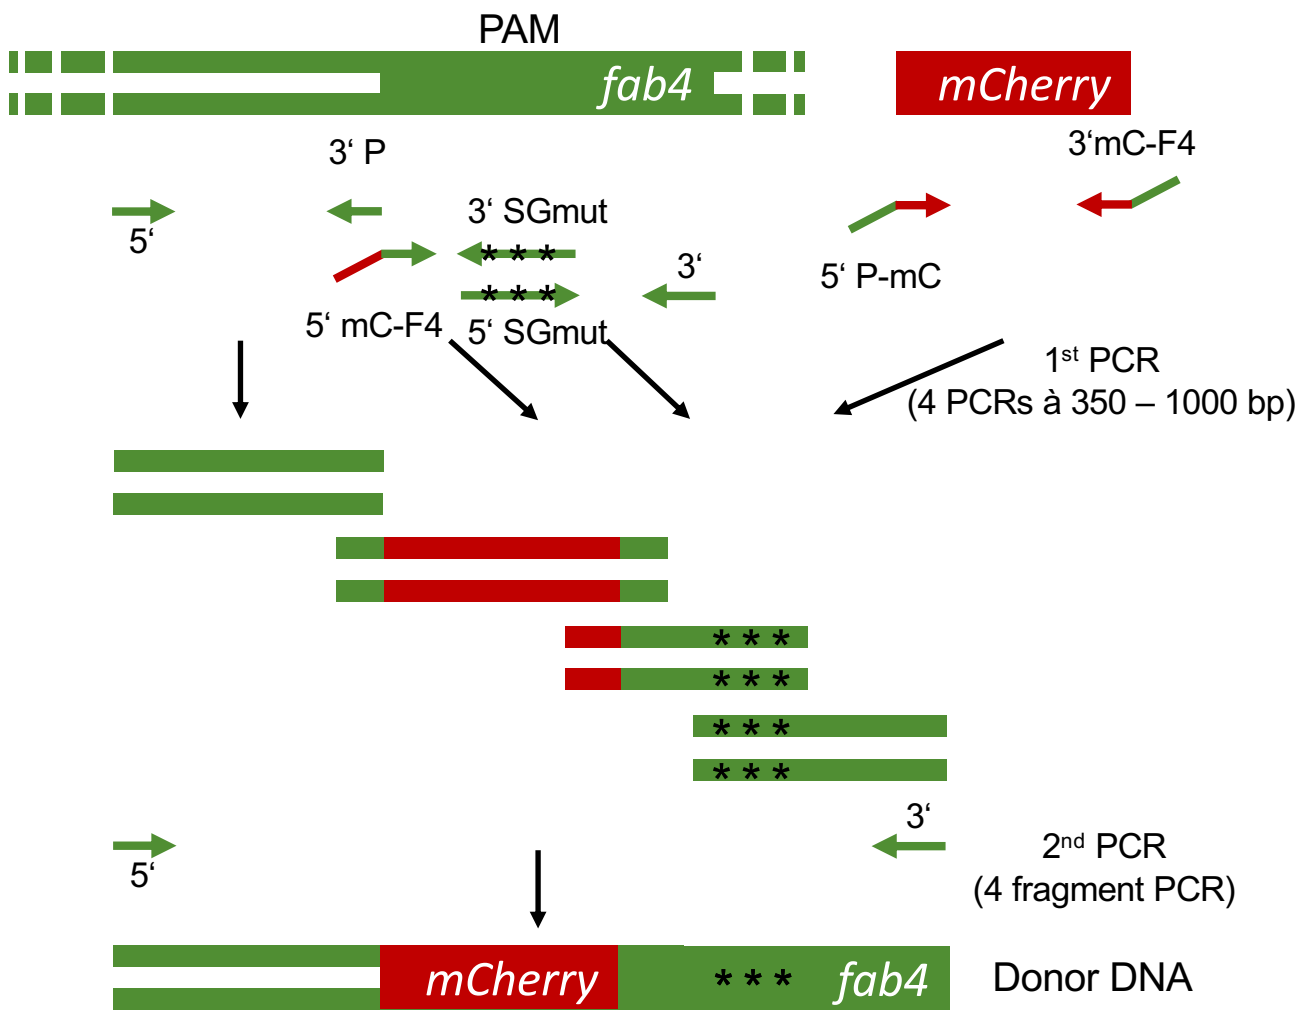

B

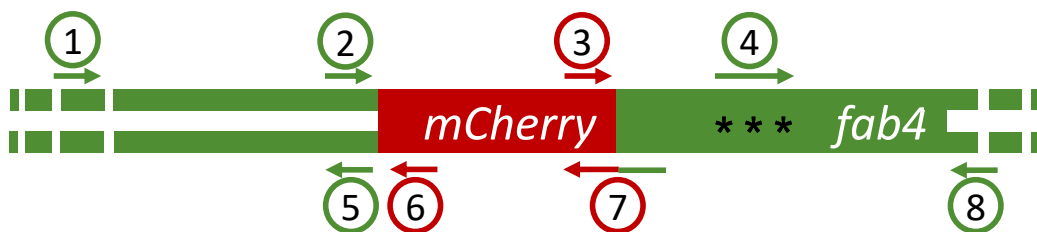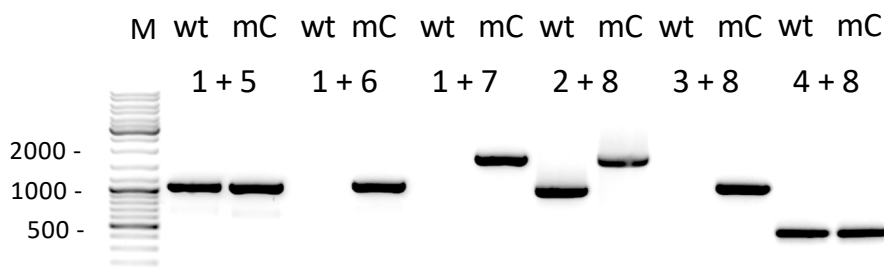

Supplement: s1 [file s1]
